# Supplementary material for: Promoting the Psychological Well-Being of Healthcare Providers Facing the Burden of Adverse Events: A Systematic Review of Second Victim Support Resources
Source: Int J Environ Res Public Health. 2021 May 11;18(10):5080. doi: 10.3390/ijerph18105080 (PMC8151650; doi:10.3390/ijerph18105080)
Supplement: Supplementary file 1 [file ijerph-18-05080-s001.zip]

Archive with 8 entries (8 files):
- Supplementary File 1.pdf
- __MACOSX/._Supplementary File 1.pdf
- Supplementary File 2.pdf
- __MACOSX/._Supplementary File 2.pdf
- Supplementary File 3.pdf
- __MACOSX/._Supplementary File 3.pdf
- Supplementary File 4.pdf
- __MACOSX/._Supplementary File 4.pdf
